# Supplementary material for: Côte d’Ivoire Dual Burden of Disease (CoDuBu): Study Protocol to Investigate the Co-occurrence of Chronic Infections and Noncommunicable Diseases in Rural Settings of Epidemiological Transition
Source: PubMed Central journal article supplement (PMC5681722; doi:10.2196/resprot.8599), 2017-10-27
Supplement: resprot_v6i10e210_app2.pdf [file resprot_v6i10e210_app2.pdf]

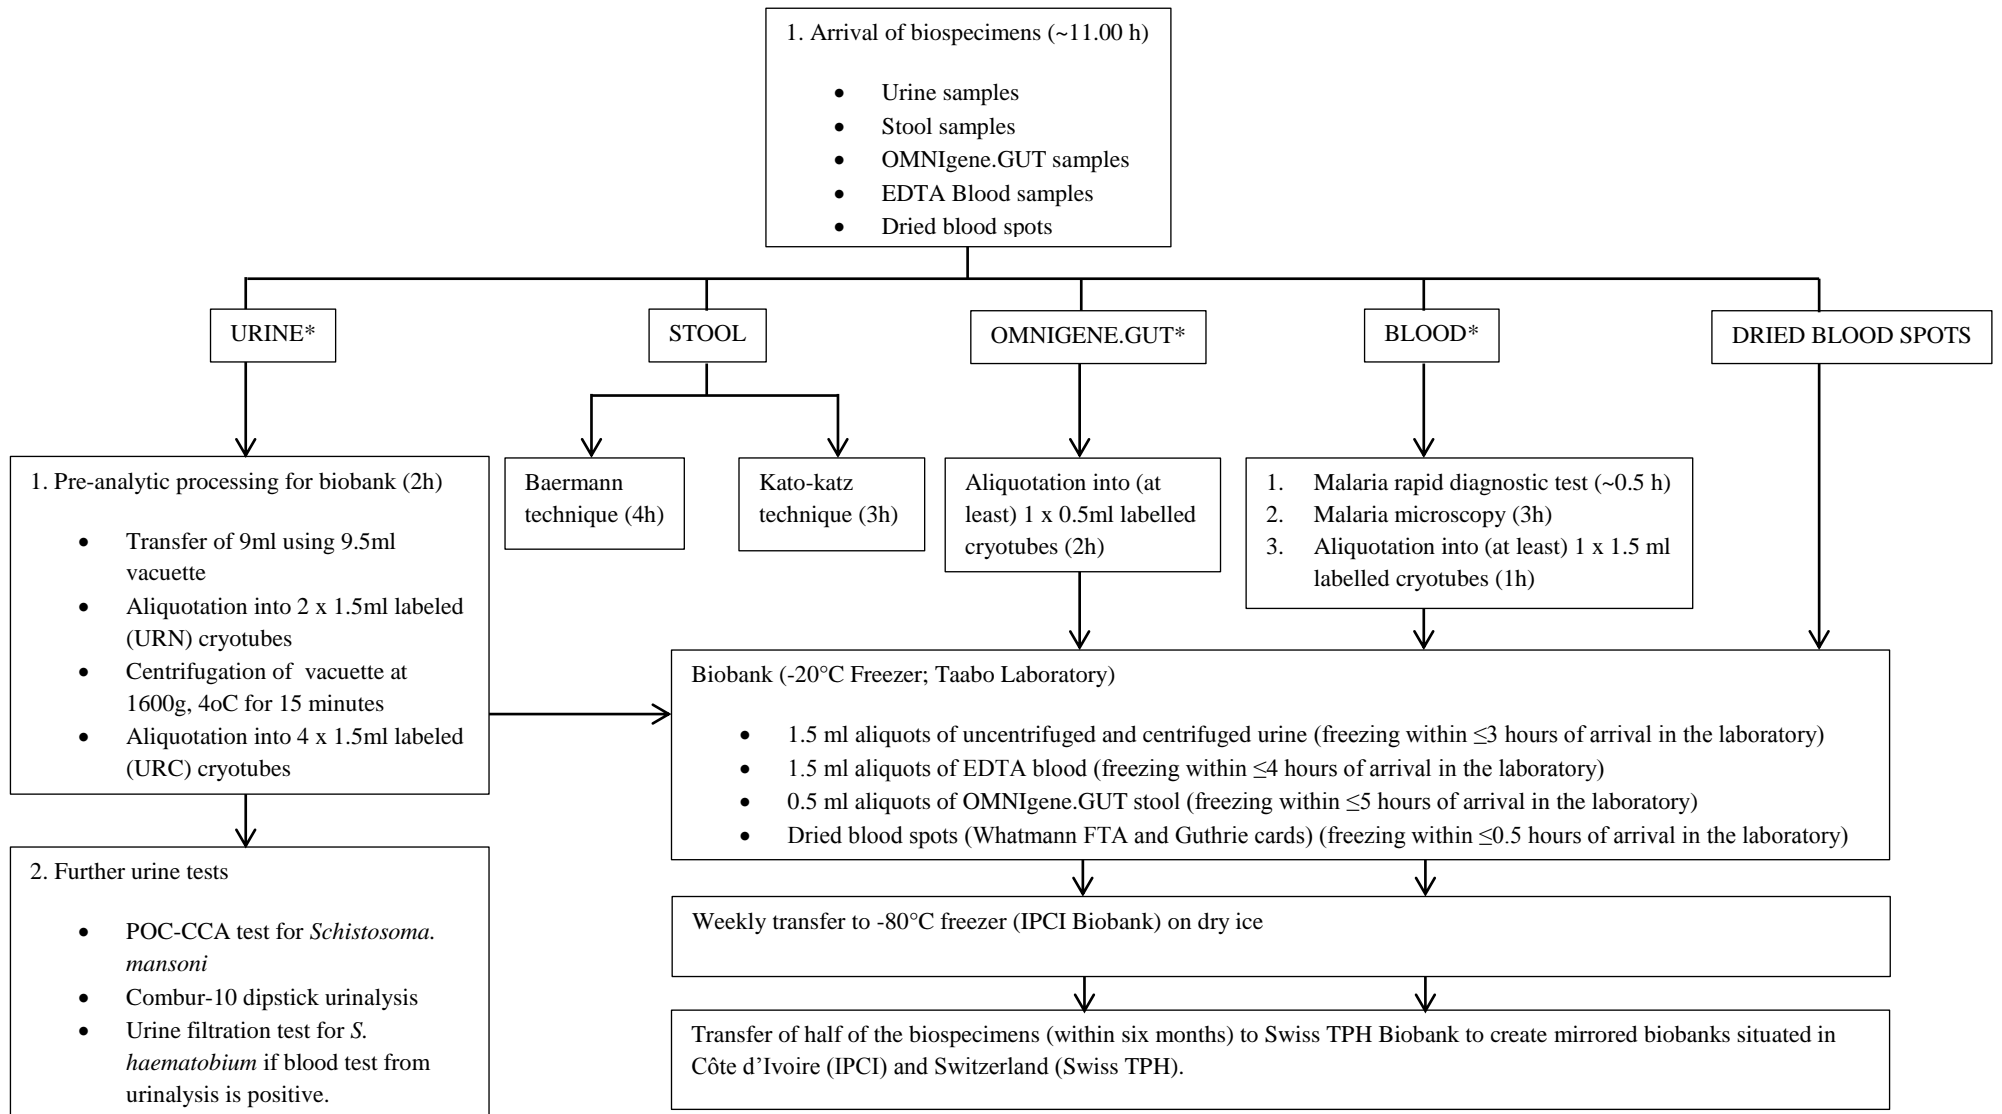

\*Biospecimen kept in refrigerator until analyses and aliquoting. IPCI: Institut Pasteur de Côte d'Ivoire; Swiss TPH: Swiss Tropical and Public Health Institute
